# Supplementary material for: Physicochemical Stability of Hospital Parenteral Nutrition Solutions: Effect of Changes in Composition and Storage Protocol
Source: MDPI journal article supplement (doi:10.3390/pharmaceutics16050572), 2024-04-23
Supplement: s1 [file s1]

## SUPPLEMENTARY MATERIAL:

**Table S1.** Calculated droplet diameter parameters for increasing [calcium] samples (PNBASE, PN1-PN4). All days of analysis (1, 3, 10 and 14) and both storage conditions (RT: room temperature, 4°C: refrigerator).

| Sample | Day | T <sup>a</sup> | MDD ± SD (μm) | MDD1 ± SD (μm) | PCT1 (%) | MDD2 ± SD (μm) | PFAT1 ± SD (%) | PFAT2 ± SD (%) |
|--------|-----|----------------|---------------|----------------|----------|----------------|----------------|----------------|
| NPBASE | 3   | RT             | 0,437 ± 0     | 0,416 ± 0      | 98,54    | 1,848 ± 0,001  | 1,458 ± 0,04   | 0,444 ± 0,01   |
|        | 10  | RT             | 0,401 ± 0,001 | 0,401 ± 0,001  | 100,00   | -              | -              | -              |
|        | 14  | RT             | 0,437 ± 0     | 0,417 ± 0      | 98,66    | 1,886 ± 0,004  | 1,344 ± 0,021  | 0,506 ± 0,006  |
|        | 1   | 4°C            | 0,441 ± 0,002 | 0,418 ± 0      | 98,30    | 1,763 ± 0,083  | 1,699 ± 0,039  | 0,286 ± 0,251  |
|        | 3   | 4°C            | 0,420 ± 0     | 0,420 ± 0      | 100,00   | -              | -              | -              |
|        | 10  | 4°C            | 0,416 ± 0,001 | 0,416 ± 0,001  | 100,00   | -              | -              | -              |
|        | 14  | 4°C            | 0,428 ± 0,001 | 0,416 ± 0      | 99,04    | 1,689 ± 0,014  | 0,955 ± 0,032  | 0,047 ± 0,02   |
| PN1    | 3   | RT             | 0,420 ± 0     | 0,420 ± 0      | 100,00   | -              | -              | -              |
|        | 10  | RT             | 0,417 ± 0,001 | 0,417 ± 0,001  | 100,00   | -              | -              | -              |
|        | 14  | RT             | 0,439 ± 0,002 | 0,418 ± 0      | 98,54    | 1,864 ± 0,024  | 1,462 ± 0,073  | 0,49 ± 0,1     |
|        | 1   | 4°C            | 0,431 ± 0,001 | 0,417 ± 0      | 98,92    | 1,696 ± 0,019  | 1,078 ± 0,044  | 0,065 ± 0,023  |
|        | 3   | 4°C            | 0,422 ± 0     | 0,422 ± 0      | 100,00   | -              | -              | -              |
|        | 10  | 4°C            | 0,417 ± 0,001 | 0,417 ± 0,001  | 100,00   | -              | -              | -              |
|        | 14  | 4°C            | 0,435 ± 0,001 | 0,417 ± 0      | 98,62    | 1,759 ± 0,014  | 1,384 ± 0,019  | 0,211 ± 0,037  |
| PN2    | 3   | RT             | 0,421 ± 0     | 0,421 ± 0      | 100,00   | -              | -              | -              |
|        | 10  | RT             | 0,422 ± 0,001 | 0,420 ± 0      | 99,82    | 1,409 ± 0,027  | 0,181 ± 0,076  | -              |
|        | 14  | RT             | 0,438 ± 0,002 | 0,417 ± 0,001  | 98,53    | 1,842 ± 0,032  | 1,469 ± 0,061  | 0,433 ± 0,115  |
|        | 1   | 4°C            | 0,432 ± 0,001 | 0,417 ± 0      | 98,84    | 1,723 ± 0,013  | 1,16 ± 0,043   | 0,112 ± 0,029  |
|        | 3   | 4°C            | 0,427 ± 0,001 | 0,421 ± 0      | 99,53    | 1,525 ± 0,009  | 0,472 ± 0,051  | -              |
|        | 10  | 4°C            | 0,422 ± 0,001 | 0,422 ± 0,001  | 100,00   | -              | -              | -              |
|        | 14  | 4°C            | 0,444 ± 0,001 | 0,418 ± 0      | 98,17    | 1,853 ± 0,008  | 1,833 ± 0,008  | 0,59 ± 0,028   |
| PN3    | 3   | RT             | 0,422 ± 0,001 | 0,422 ± 0,001  | 100,00   | -              | -              | -              |
|        | 10  | RT             | 0,413 ± 0,001 | 0,413 ± 0,001  | 100,00   | -              | -              | -              |
|        | 14  | RT             | 0,429 ± 0,001 | 0,416 ± 0      | 99,06    | 1,758 ± 0,015  | 0,936 ± 0,064  | 0,129 ± 0,035  |
|        | 1   | 4°C            | 0,43 ± 0,001  | 0,416 ± 0      | 98,92    | 1,723 ± 0,012  | 1,084 ± 0,036  | 0,099 ± 0,019  |
|        | 3   | 4°C            | 0,426 ± 0     | 0,42 ± 0       | 99,53    | 1,546 ± 0,014  | 0,467 ± 0,036  | -              |
|        | 10  | 4°C            | 0,420 ± 0     | 0,42 ± 0       | 100,00   | -              | -              | -              |
|        | 14  | 4°C            | 0,439 ± 0     | 0,417 ± 0      | 98,46    | 1,835 ± 0,006  | 1,541 ± 0,016  | 0,437 ± 0,016  |
| PN4    | 3   | RT             | 0,431 ± 0     | 0,416 ± 0      | 98,91    | 1,81 ± 0,01    | 1,089 ± 0,019  | 0,249 ± 0,025  |
|        | 10  | RT             | 0,422 ± 0,001 | 0,422 ± 0,001  | 100,00   | -              | -              | -              |
|        | 14  | RT             | 0,455 ± 0,001 | 0,424 ± 0      | 97,92    | 1,914 ± 0,003  | 2,081 ± 0,052  | 0,898 ± 0,035  |
|        | 1   | 4°C            | 0,432 ± 0     | 0,420 ± 0      | 98,92    | 1,575 ± 0,002  | 1,075 ± 0,013  | -              |
|        | 3   | 4°C            | 0,389 ± 0,001 | 0,389 ± 0,001  | 100,00   | -              | -              | -              |
|        | 10  | 4°C            | 0,425 ± 0     | 0,425 ± 0      | 100,00   | -              | -              | -              |
|        | 14  | 4°C            | 0,482 ± 0,001 | 0,430 ± 0      | 96,60    | 1,971 ± 0,02   | 3,404 ± 0,025  | 1,755 ± 0,085  |

*Results where the fraction of droplets >1μm is >5% and those exceeding USP specifications are indicated in bold; SD: standard deviation relative to the technical triplicate performed on each day of measurement; T<sup>a</sup>: storage temperature; MDD: mean total droplet diameter; TMG1: mean droplet diameter of the first peak; MDD2: mean droplet diameter of the second peak; PCT1: percentage distribution of peak 1 in relation to the total; PFAT1: percentage of droplets larger than 1μm; PFAT2: percentage of droplets larger than 2μm.*

**Table S2.** Calculated droplet diameter parameters for increasing [magnesium] samples (PN5-PN8). All days of analysis (1, 3, 10 and 14) and both storage conditions (RT: room temperature, 4°C: refrigerator).

| Sample | Day | T <sup>a</sup> | MDD ± SD (μm)        | MDD1 ± SD (μm) | PCT1 (%) | MDD2 ± SD (μm) | PFAT1 ± SD (%) | PFAT2 ± SD (%) | PFAT3 ± SD (%) |
|--------|-----|----------------|----------------------|----------------|----------|----------------|----------------|----------------|----------------|
| PN5    | 3   | RT             | 0,394 ± 0            | 0,394 ± 0      | 100,00   | -              | -              | -              | -              |
|        | 10  | RT             | 0,406 ± 0            | 0,406 ± 0      | 100,00   | -              | -              | -              | -              |
|        | 14  | RT             | 0,456 ± 0,001        | 0,424 ± 0      | 97,66    | 1,825 ± 0,009  | 2,337 ± 0,01   | 0,665 ± 0,037  | -              |
|        | 1   | 4°C            | 0,431 ± 0            | 0,419 ± 0      | 98,97    | 1,582 ± 0,003  | 1,031 ± 0,011  | -              | -              |
|        | 3   | 4°C            | 0,391 ± 0,001        | 0,391 ± 0,001  | 100,00   | -              | -              | -              | -              |
|        | 10  | 4°C            | 0,390 ± 0            | 0,390 ± 0      | 100,00   | -              | -              | -              | -              |
|        | 14  | 4°C            | 0,455 ± 0,001        | 0,424 ± 0      | 97,79    | 1,832 ± 0,009  | 2,214 ± 0,033  | 0,652 ± 0,044  | -              |
| PN6    | 3   | RT             | 0,386 ± 0            | 0,386 ± 0      | 100,00   | -              | -              | -              | -              |
|        | 10  | RT             | 0,422 ± 0            | 0,422 ± 0      | 100,00   | -              | -              | -              | -              |
|        | 14  | RT             | 0,460 ± 0            | 0,424 ± 0      | 97,53    | 1,897 ± 0,005  | 2,466 ± 0,023  | 1,000 ± 0,016  | -              |
|        | 1   | 4°C            | 0,426 ± 0            | 0,418 ± 0      | 99,34    | 1,550 ± 0,014  | 0,66 ± 0,035   | -              | -              |
|        | 3   | 4°C            | 0,378 ± 0,001        | 0,378 ± 0,001  | 100,00   | -              | -              | -              | -              |
|        | 10  | 4°C            | 0,418 ± 0,001        | 0,418 ± 0,001  | 100,00   | -              | -              | -              | -              |
| PN7    | 14  | 4°C            | 0,455 ± 0,001        | 0,422 ± 0      | 97,71    | 1,863 ± 0,007  | 2,294 ± 0,01   | 0,798 ± 0,029  | -              |
|        | 3   | RT             | 0,384 ± 0,001        | 0,384 ± 0,001  | 100,00   | -              | -              | -              | -              |
|        | 10  | RT             | 0,423 ± 0,001        | 0,422 ± 0      | 99,89    | -              | 0,113 ± 0,075  | -              | -              |
|        | 14  | RT             | 0,487 ± 0,001        | 0,429 ± 0      | 96,33    | 2 ± 0,004      | 3,674 ± 0,059  | 1,970 ± 0,02   | 0,032 ± 0,013  |
|        | 1   | 4°C            | 0,424 ± 0            | 0,418 ± 0      | 99,46    | 1,525 ± 0,006  | 0,538 ± 0,024  | -              | -              |
|        | 3   | 4°C            | 0,406 ± 0,001        | 0,406 ± 0,001  | 100,00   | -              | -              | -              | -              |
|        | 10  | 4°C            | 0,426 ± 0            | 0,426 ± 0      | 99,94    | 1,347 ± 0,009  | 0,064 ± 0,088  | -              | -              |
| PN8    | 14  | 4°C            | 0,463 ± 0,001        | 0,423 ± 0      | 97,35    | 1,926 ± 0,002  | 2,650 ± 0,027  | 1,198 ± 0,018  | -              |
|        | 3   | RT             | 0,397 ± 0,001        | 0,397 ± 0,001  | 100,00   | -              | -              | -              | -              |
|        | 10  | RT             | <b>0,506 ± 0,003</b> | 0,426 ± 0      | 95,54    | 2,062 ± 0,002  | 4,463 ± 0,091  | 2,88 ± 0,077   | 0,541 ± 0,093  |
|        | 14  | RT             | 0,483 ± 0,001        | 0,422 ± 0      | 96,69    | 2,165 ± 0,002  | 3,305 ± 0,038  | 2,459 ± 0,027  | 0,331 ± 0,024  |
|        | 1   | 4°C            | 0,427 ± 0            | 0,415 ± 0      | 99,10    | 1,777 ± 0,015  | 0,895 ± 0,007  | 0,143 ± 0,018  | -              |
|        | 3   | 4°C            | 0,391 ± 0,01         | 0,391 ± 0,01   | 100,00   | -              | -              | -              | -              |
|        | 10  | 4°C            | 0,477 ± 0,002        | 0,425 ± 0      | 96,79    | 2,029 ± 0,007  | 3,215 ± 0,076  | 1,868 ± 0,072  | 0,044 ± 0,025  |
| PN8    | 14  | 4°C            | 0,435 ± 0,001        | 0,415 ± 0      | 98,67    | 1,859 ± 0,006  | 1,328 ± 0,034  | 0,428 ± 0,025  | -              |

Results where the fraction of cells >1μm is >5% and those exceeding USP specifications are indicated in bold; SD: standard deviation relative to the technical triplicate performed on each day of measurement; T<sup>a</sup>: storage temperature; A: ambient; N: refrigerator; MDD: mean total cell diameter; MDD1: mean droplet diameter of the first peak; MDD2: mean droplet diameter of the second peak; PCT1: percentage distribution of peak 1 in relation to the total; PFAT1: percentage of droplets larger than 1μm; PFAT2: percentage of droplets larger than 2μm; PFAT3: percentage of droplets larger than 3μm.

**Table S3.** Calculated droplet diameter parameters for increasing [phosphorus] samples (PN9-PN12). All days of analysis (1, 3, 10 and 14) and both storage conditions (RT: room temperature, 4°C: refrigerator).

| Sample                                                                                                                                                                                                                                                                                                                                                                                                                                                                                                                                                                                                                          | Day | T <sup>±</sup> | MDD ± SD (μm) | MDD1 ± SD (μm) | PCT1 (%) | MDD2 ± SD (μm) | PFAT1 ± SD (%) | PFAT2 ± SD (%) | PFAT3 ± SD (%) |
|---------------------------------------------------------------------------------------------------------------------------------------------------------------------------------------------------------------------------------------------------------------------------------------------------------------------------------------------------------------------------------------------------------------------------------------------------------------------------------------------------------------------------------------------------------------------------------------------------------------------------------|-----|----------------|---------------|----------------|----------|----------------|----------------|----------------|----------------|
| PN9                                                                                                                                                                                                                                                                                                                                                                                                                                                                                                                                                                                                                             | 3   | RT             | 0,387 ± 0,006 | 0,387 ± 0,006  | 100,00   | -              | -              | -              | -              |
|                                                                                                                                                                                                                                                                                                                                                                                                                                                                                                                                                                                                                                 | 10  | RT             | 0,442 ± 0,001 | 0,419 ± 0      | 98,41    | 1,895 ± 0,013  | 1,588 ± 0,044  | 0,629 ± 0,059  | -              |
|                                                                                                                                                                                                                                                                                                                                                                                                                                                                                                                                                                                                                                 | 14  | RT             | 0,435 ± 0     | 0,415 ± 0      | 98,66    | 1,865 ± 0      | 1,340 ± 0,033  | 0,448 ± 0,012  | -              |
|                                                                                                                                                                                                                                                                                                                                                                                                                                                                                                                                                                                                                                 | 1   | 4°C            | 0,427 ± 0,001 | 0,416 ± 0      | 99,13    | 1,753 ± 0,006  | 0,869 ± 0,047  | 0,110 ± 0,012  | -              |
|                                                                                                                                                                                                                                                                                                                                                                                                                                                                                                                                                                                                                                 | 3   | 4°C            | 0,386 ± 0,001 | 0,386 ± 0,001  | 100,00   | -              | -              | -              | -              |
|                                                                                                                                                                                                                                                                                                                                                                                                                                                                                                                                                                                                                                 | 10  | 4°C            | 0,444 ± 0,001 | 0,419 ± 0      | 98,30    | 1,896 ± 0,011  | 1,701 ± 0,037  | 0,676 ± 0,052  | -              |
|                                                                                                                                                                                                                                                                                                                                                                                                                                                                                                                                                                                                                                 | 14  | 4°C            | 0,446 ± 0,001 | 0,418 ± 0      | 98,21    | 1,957 ± 0,004  | 1,79 ± 0,034   | 0,907 ± 0,024  | -              |
| PN10                                                                                                                                                                                                                                                                                                                                                                                                                                                                                                                                                                                                                            | 3   | RT             | 0,397 ± 0,001 | 0,397 ± 0,001  | 100,00   | -              | -              | -              | -              |
|                                                                                                                                                                                                                                                                                                                                                                                                                                                                                                                                                                                                                                 | 10  | RT             | 0,441 ± 0,001 | 0,418 ± 0      | 98,50    | 1,92 ± 0,011   | 1,505 ± 0,032  | 0,667 ± 0,045  | -              |
|                                                                                                                                                                                                                                                                                                                                                                                                                                                                                                                                                                                                                                 | 14  | RT             | 0,437 ± 0,001 | 0,417 ± 0      | 98,65    | 1,932 ± 0,004  | 1,345 ± 0,025  | 0,623 ± 0,02   | -              |
|                                                                                                                                                                                                                                                                                                                                                                                                                                                                                                                                                                                                                                 | 1   | 4°C            | 0,429 ± 0,001 | 0,416 ± 0      | 99,05    | 1,764 ± 0,006  | 0,953 ± 0,039  | 0,139 ± 0,016  | -              |
|                                                                                                                                                                                                                                                                                                                                                                                                                                                                                                                                                                                                                                 | 3   | 4°C            | 0,396 ± 0,001 | 0,396 ± 0,001  | 100,00   | -              | -              | -              | -              |
|                                                                                                                                                                                                                                                                                                                                                                                                                                                                                                                                                                                                                                 | 10  | 4°C            | 0,440 ± 0,001 | 0,417 ± 0      | 98,40    | 1,856 ± 0,019  | 1,598 ± 0,048  | 0,513 ± 0,077  | -              |
|                                                                                                                                                                                                                                                                                                                                                                                                                                                                                                                                                                                                                                 | 14  | 4°C            | 0,416 ± 0     | 0,411 ± 0      | 99,61    | 1,835 ± 0,001  | 0,39 ± 0,018   | 0,091 ± 0,006  | -              |
| PN11                                                                                                                                                                                                                                                                                                                                                                                                                                                                                                                                                                                                                            | 3   | RT             | 0,394 ± 0,001 | 0,394 ± 0,001  | 100,00   | -              | -              | -              | -              |
|                                                                                                                                                                                                                                                                                                                                                                                                                                                                                                                                                                                                                                 | 10  | RT             | 0,446 ± 0,001 | 0,42 ± 0       | 98,25    | 1,902 ± 0,014  | 1,755 ± 0,046  | 0,721 ± 0,067  | -              |
|                                                                                                                                                                                                                                                                                                                                                                                                                                                                                                                                                                                                                                 | 14  | RT             | 0,441 ± 0,001 | 0,417 ± 0      | 98,42    | 1,93 ± 0,009   | 1,578 ± 0,029  | 0,726 ± 0,038  | -              |
|                                                                                                                                                                                                                                                                                                                                                                                                                                                                                                                                                                                                                                 | 1   | 4°C            | 0,431 ± 0,001 | 0,416 ± 0      | 98,92    | 1,747 ± 0,008  | 1,079 ± 0,044  | 0,138 ± 0,017  | -              |
|                                                                                                                                                                                                                                                                                                                                                                                                                                                                                                                                                                                                                                 | 3   | 4°C            | 0,387 ± 0,001 | 0,387 ± 0,001  | 100,00   | -              | -              | -              | -              |
|                                                                                                                                                                                                                                                                                                                                                                                                                                                                                                                                                                                                                                 | 10  | 4°C            | 0,446 ± 0,001 | 0,418 ± 0      | 98,14    | 1,926 ± 0,013  | 1,865 ± 0,032  | 0,850 ± 0,055  | -              |
|                                                                                                                                                                                                                                                                                                                                                                                                                                                                                                                                                                                                                                 | 14  | 4°C            | 0,454 ± 0,001 | 0,42 ± 0       | 97,83    | 1,998 ± 0,017  | 2,174 ± 0,044  | 1,232 ± 0,075  | -              |
| PN12                                                                                                                                                                                                                                                                                                                                                                                                                                                                                                                                                                                                                            | 3   | RT             | 0,486 ± 0,001 | 0,424 ± 0      | 96,35    | 2,086 ± 0,003  | 3,652 ± 0,023  | 2,374 ± 0,029  | 0,088 ± 0,022  |
|                                                                                                                                                                                                                                                                                                                                                                                                                                                                                                                                                                                                                                 | 10  | RT             | 0,494 ± 0,001 | 0,422 ± 0      | 95,81    | 2,05 ± 0,003   | 4,187 ± 0,083  | 2,528 ± 0,059  | 0,383 ± 0,013  |
|                                                                                                                                                                                                                                                                                                                                                                                                                                                                                                                                                                                                                                 | 14  | RT             | 0,437 ± 0,001 | 0,415 ± 0      | 98,51    | 1,876 ± 0,014  | 1,492 ± 0,037  | 0,535 ± 0,052  | -              |
|                                                                                                                                                                                                                                                                                                                                                                                                                                                                                                                                                                                                                                 | 1   | 4°C            | 0,443 ± 0     | 0,419 ± 0      | 98,30    | 1,852 ± 0,006  | 1,701 ± 0,025  | 0,541 ± 0,012  | -              |
|                                                                                                                                                                                                                                                                                                                                                                                                                                                                                                                                                                                                                                 | 3   | 4°C            | 0,47 ± 0,001  | 0,425 ± 0      | 97,05    | 1,934 ± 0,006  | 2,946 ± 0,018  | 1,364 ± 0,035  | -              |
|                                                                                                                                                                                                                                                                                                                                                                                                                                                                                                                                                                                                                                 | 10  | 4°C            | 0,445 ± 0     | 0,421 ± 0      | 98,13    | 1,694 ± 0,006  | 1,87 ± 0,019   | 0,179 ± 0,013  | -              |
|                                                                                                                                                                                                                                                                                                                                                                                                                                                                                                                                                                                                                                 | 14  | 4°C            | 0,453 ± 0,002 | 0,416 ± 0      | 97,76    | 2,047 ± 0,02   | 2,239 ± 0,079  | 1,440 ± 0,107  | -              |
| Results where the fraction of cells >1μm is >5% and those exceeding USP specifications are indicated in bold; SD: standard deviation relative to the technical triplicate performed on each day of measurement; T <sup>±</sup> : storage temperature; A: ambient; N: refrigerator; MDD: mean total cell diameter; MDD1: mean droplet diameter of the first peak; MDD2: mean droplet diameter of the second peak; PCT1: percentage distribution of peak 1 in relation to the total; PFAT1: percentage of droplets larger than 1μm; PFAT2: percentage of droplets larger than 2μm; PFAT3: percentage of droplets larger than 3μm. |     |                |               |                |          |                |                |                |                |

**Table S4:** Calculated droplet diameter parameters for decreasing [lipid] samples (PN13-PN17). All days of analysis (1, 3, 10 and 14) and both storage conditions (RT: room temperature, 4°C: refrigerator).

| Sample | Day | T <sup>a</sup> | MDD ± SD (µm)        | MDD1 ± SD (µm) | PCT1 (%)     | MDD2 ± SD (µm) | MDD3 ± SD (µm) | PFAT1 ± SD (%) | PFAT2 ± SD (%) | PFAT3 ± SD (%) |
|--------|-----|----------------|----------------------|----------------|--------------|----------------|----------------|----------------|----------------|----------------|
| PN13   | 3   | RT             | 0,444 ± 0            | 0,421 ± 0      | 98,34        | 1,841 ± 0,006  | -              | 1,657 ± 0,012  | 0,504 ± 0,02   | -              |
|        | 10  | RT             | 0,432 ± 0,001        | 0,418 ± 0      | 99,01        | 1,705 ± 0,015  | -              | 1,075 ± 0,093  | 0,121 ± 0,012  | -              |
|        | 14  | RT             | 0,442 ± 0,002        | 0,418 ± 0      | 98,30        | 1,838 ± 0,021  | -              | 1,700 ± 0,109  | 0,499 ± 0,088  | -              |
|        | 1   | 4°C            | 0,448 ± 0,003        | 0,421 ± 0,001  | 98,11        | 1,851 ± 0,039  | -              | 1,889 ± 0,076  | 0,608 ± 0,156  | -              |
|        | 3   | 4°C            | 0,457 ± 0,001        | 0,426 ± 0      | 97,51        | 1,691 ± 0,012  | -              | 2,494 ± 0,012  | 0,265 ± 0,041  | -              |
|        | 10  | 4°C            | 0,429 ± 0,001        | 0,423 ± 0,002  | 99,36        | 1,330 ± 0,03   | -              | 0,643 ± 0,29   | -              | -              |
|        | 14  | 4°C            | 0,435 ± 0,001        | 0,416 ± 0      | 98,58        | 1,749 ± 0,011  | -              | 1,422 ± 0,04   | 0,199 ± 0,026  | -              |
| PN14   | 3   | RT             | 0,425 ± 0            | 0,421 ± 0      | 99,68        | 1,528 ± 0,005  | -              | 0,318 ± 0,008  | -              | -              |
|        | 10  | RT             | 0,422 ± 0,001        | 0,419 ± 0      | 99,73        | -              | -              | 0,271 ± 0,138  | -              | -              |
|        | 14  | RT             | 0,456 ± 0,002        | 0,422 ± 0      | 97,72        | 1,894 ± 0,018  | -              | 2,285 ± 0,102  | 0,913 ± 0,104  | -              |
|        | 1   | 4°C            | 0,478 ± 0,004        | 0,426 ± 0      | 96,68        | 1,985 ± 0,006  | -              | 3,324 ± 0,171  | 1,729 ± 0,128  | 0,021 ± 0,073  |
|        | 3   | 4°C            | 0,456 ± 0,001        | 0,425 ± 0,001  | 97,47        | 1,668 ± 0,014  | -              | 2,527 ± 0,025  | 0,208 ± 0,036  | -              |
|        | 10  | 4°C            | 0,435 ± 0,001        | 0,429 ± 0,002  | 99,28        | 1,256 ± 0,027  | -              | 0,720 ± 0,338  | -              | -              |
|        | 14  | 4°C            | 0,448 ± 0,002        | 0,420 ± 0      | 97,95        | 1,803 ± 0,029  | -              | 2,050 ± 0,128  | 0,500 ± 0,109  | -              |
| PN15   | 3   | RT             | <b>0,514 ± 0,005</b> | 0,423 ± 0      | 95,92        | 2,006 ± 0,009  | 3,854 ± 0,102  | 4,075 ± 0,11   | 2,955 ± 0,123  | 1,466 ± 0,086  |
|        | 10  | RT             | 0,409 ± 0,003        | 0,409 ± 0,003  | 100,00       | -              | -              | -              | -              | -              |
|        | 14  | RT             | 0,451 ± 0,004        | 0,417 ± 0      | 97,96        | 2,052 ± 0,028  | -              | 2,044 ± 0,186  | 1,326 ± 0,184  | -              |
|        | 1   | 4°C            | 0,474 ± 0,001        | 0,424 ± 0      | 96,81        | 2,002 ± 0,01   | -              | 3,191 ± 0,054  | 1,763 ± 0,063  | -              |
|        | 3   | 4°C            | <b>0,503 ± 0,013</b> | 0,431 ± 0,002  | 95,73        | 1,959 ± 0,006  | 3,386 ± 0,106  | 4,273 ± 0,41   | 2,277 ± 0,478  | 0,460 ± 0,518  |
|        | 10  | 4°C            | 0,44 ± 0,004         | 0,419 ± 0      | 98,25        | 1,614 ± 0,062  | -              | 1,755 ± 0,274  | 0,044 ± 0,025  | -              |
|        | 14  | 4°C            | 0,45 ± 0,003         | 0,419 ± 0      | 97,92        | 1,924 ± 0,026  | -              | 2,076 ± 0,138  | 0,929 ± 0,143  | -              |
| PN16   | 3   | RT             | <b>0,562 ± 0,014</b> | 0,435 ± 0,002  | <b>91,68</b> | 1,913 ± 0,012  | 2,888 ± 0      | 8,317 ± 0,876  | 3,574 ± 0,35   | 0,366 ± 0,046  |
|        | 10  | RT             | <b>0,593 ± 0,009</b> | 0,419 ± 0,001  | <b>92,73</b> | 2,073 ± 0,01   | 3,736 ± 0,076  | 7,275 ± 0,285  | 5,603 ± 0,23   | 3,113 ± 0,094  |
|        | 14  | RT             | <b>0,509 ± 0,019</b> | 0,419 ± 0      | 95,76        | 2,119 ± 0,004  | 3,362 ± 0,343  | 4,241 ± 0,392  | 3,238 ± 0,442  | 1,363 ± 0,421  |
|        | 1   | 4°C            | <b>0,579 ± 0,029</b> | 0,449 ± 0,007  | <b>89,68</b> | 1,708 ± 0,071  | -              | 10,324 ± 1,359 | 2,383 ± 1,059  | -              |
|        | 3   | 4°C            | <b>0,554 ± 0,029</b> | 0,432 ± 0,004  | <b>92,92</b> | 1,918 ± 0,039  | 3,151 ± 0,095  | 7,078 ± 1,282  | 3,555 ± 0,66   | 1,307 ± 0,543  |
|        | 10  | 4°C            | <b>0,52 ± 0,005</b>  | 0,422 ± 0      | <b>94,85</b> | 1,992 ± 0,002  | 3,281 ± 0,002  | 5,153 ± 0,201  | 3,175 ± 0,139  | 1,248 ± 0,085  |
|        | 14  | 4°C            | 0,387 ± 0            | 0,387 ± 0      | 100,00       | -              | -              | -              | -              | -              |
| PN17   | 3   | RT             | <b>0,617 ± 0,005</b> | 0,435 ± 0,001  | <b>87,57</b> | 1,891 ± 0,013  | 2,824 ± 0,036  | 12,434 ± 0,099 | 5,838 ± 0,067  | -              |
|        | 10  | RT             | <b>0,561 ± 0,001</b> | 0,430 ± 0      | <b>92,08</b> | 2,083 ± 0,002  | -              | 7,920 ± 0,032  | 5,319 ± 0,04   | -              |
|        | 14  | RT             | 0,383 ± 0,004        | 0,383 ± 0,004  | 100,00       | -              | -              | -              | -              | -              |
|        | 1   | 4°C            | <b>0,734 ± 0,004</b> | 0,460 ± 0,002  | <b>78,76</b> | 1,714 ± 0,001  | 2,885 ± 0      | 21,245 ± 0,184 | 6,598 ± 0,117  | 0,453 ± 0,015  |
|        | 3   | 4°C            | <b>0,594 ± 0,001</b> | 0,433 ± 0      | <b>90,44</b> | 1,977 ± 0,002  | 2,962 ± 0      | 9,563 ± 0,034  | 4,908 ± 0,031  | 1,246 ± 0,01   |
|        | 10  | 4°C            | <b>0,502 ± 0,002</b> | 0,427 ± 0      | 95,17        | 1,988 ± 0,01   | -              | 4,830 ± 0,197  | 2,535 ± 0,048  | -              |
|        | 14  | 4°C            | 0,394 ± 0            | 0,394 ± 0      | 100,00       | -              | -              | -              | -              | -              |

Results where the fraction of droplets >1µm is >5% and those exceeding USP specifications are indicated in bold; SD: standard deviation relative to the technical triplicate performed on each day of measurement; T<sup>a</sup>: storage temperature; A: ambient; N: refrigerator; MDD: mean total droplet diameter; MDD1: mean droplet diameter of the first peak; MDD2: mean droplet diameter of the second peak; MDD3: mean droplet diameter of the third peak; PCT1: percentage distribution of peak 1 out of the total; PFAT1: percentage of droplets larger than 1µm; PFAT2: percentage of droplets larger than 2µm; PFAT3: percentage of droplets larger than 3µm.

**Table S5:** Calculated droplet diameter parameters for decreasing [amino acid] samples (PN18-PN22). All days of analysis (1, 3, 10 and 14) and both storage conditions (RT: room temperature, 4°C: refrigerator).

| Sample | Day | T <sup>a</sup> | MDD ± SD (µm)        | MDD1 ± SD (µm) | PCT1 (%)     | MDD2 ± SD (µm) | MDD3 ± SD (µm) | PFAT1 ± SD (%) | PFAT3 ± SD (%) | PFAT5 ± SD (%)       |
|--------|-----|----------------|----------------------|----------------|--------------|----------------|----------------|----------------|----------------|----------------------|
| PN18   | 3   | RT             | 0,499 ± 0,003        | 0,429 ± 0      | 95,37        | 1,873 ± 0,007  | 3,052 ± 0,05   | 4,632 ± 0,095  | 0,221 ± 0,051  | -                    |
|        | 10  | RT             | 0,451 ± 0            | 0,416 ± 0      | 97,68        | 1,918 ± 0,007  | -              | 2,324 ± 0,021  | -              | -                    |
|        | 14  | RT             | 0,387 ± 0            | 0,387 ± 0      | 100,00       | -              | -              | -              | -              | -                    |
|        | 1   | 4°C            | <b>0,579 ± 0,006</b> | 0,443 ± 0      | <b>89,66</b> | 1,761 ± 0,017  | -              | 10,335 ± 0,307 | 0,005 ± 0,003  | -                    |
|        | 3   | 4°C            | 0,505 ± 0            | 0,432 ± 0      | 95,09        | 1,879 ± 0,004  | 2,958 ± 0      | 4,911 ± 0,029  | 0,153 ± 0,002  | -                    |
|        | 10  | 4°C            | 0,448 ± 0,001        | 0,416 ± 0      | 97,80        | 1,879 ± 0,002  | -              | 2,198 ± 0,027  | -              | -                    |
|        | 14  | 4°C            | 0,393 ± 0            | 0,393 ± 0      | 100,00       | -              | -              | -              | -              | -                    |
| PN19   | 3   | RT             | 0,499 ± 0,003        | 0,429 ± 0      | 95,37        | 1,873 ± 0,007  | 3,052 ± 0,05   | 4,632 ± 0,095  | 0,221 ± 0,051  | -                    |
|        | 10  | RT             | <b>0,503 ± 0,001</b> | 0,422 ± 0      | 95,43        | 2,007 ± 0,005  | 3,247 ± 0,006  | 4,572 ± 0,041  | 0,641 ± 0,028  | -                    |
|        | 14  | RT             | 0,402 ± 0            | 0,402 ± 0      | 100,00       | -              | -              | -              | -              | -                    |
|        | 1   | 4°C            | <b>0,576 ± 0,011</b> | 0,440 ± 0,002  | <b>89,90</b> | 1,785 ± 0,037  | -              | 10,095 ± 0,411 | -              | -                    |
|        | 3   | 4°C            | 0,497 ± 0            | 0,430 ± 0      | 95,39        | 1,874 ± 0      | 2,957 ± 0,032  | 4,608 ± 0,047  | 0,096 ± 0,01   | -                    |
|        | 10  | 4°C            | 0,463 ± 0            | 0,419 ± 0      | 97,12        | 1,949 ± 0,002  | -              | 2,881 ± 0,031  | -              | -                    |
|        | 14  | 4°C            | 0,400 ± 0            | 0,400 ± 0      | 100,00       | -              | -              | -              | -              | -                    |
| PN20   | 3   | RT             | 0,395 ± 0            | 0,395 ± 0      | 100,00       | -              | -              | -              | -              | -                    |
|        | 10  | RT             | 0,438 ± 0,001        | 0,413 ± 0      | 98,38        | 1,99 ± 0,006   | -              | 1,619 ± 0,018  | -              | -                    |
|        | 14  | RT             | 0,491 ± 0            | 0,416 ± 0      | 95,77        | 2,158 ± 0,003  | 2,935 ± 0,002  | 4,228 ± 0,018  | 0,167 ± 0,006  | -                    |
|        | 1   | 4°C            | 0,437 ± 0            | 0,414 ± 0      | 98,54        | 1,935 ± 0,013  | -              | 1,462 ± 0,02   | -              | -                    |
|        | 3   | 4°C            | 0,431 ± 0            | 0,413 ± 0      | 98,69        | 1,765 ± 0,007  | -              | 1,307 ± 0,027  | -              | -                    |
|        | 10  | 4°C            | 0,433 ± 0            | 0,413 ± 0      | 98,58        | 1,839 ± 0,002  | -              | 1,419 ± 0,005  | -              | -                    |
|        | 14  | 4°C            | 0,448 ± 0,002        | 0,413 ± 0,001  | 97,98        | 2,159 ± 0,038  | 2,824 ± 0      | 2,020 ± 0,071  | -              | -                    |
| PN21   | 3   | RT             | 0,410 ± 0            | 0,410 ± 0      | 100,00       | -              | -              | -              | -              | -                    |
|        | 10  | RT             | <b>0,508 ± 0,003</b> | 0,416 ± 0      | 95,75        | 2,163 ± 0,009  | 3,319 ± 0,005  | 4,252 ± 0,098  | 1,404 ± 0,141  | -                    |
|        | 14  | RT             | <b>0,847 ± 0,017</b> | 0,424 ± 0      | <b>84,52</b> | 2,129 ± 0,004  | 3,815 ± 0,137  | 15,481 ± 0,139 | 9,068 ± 0,111  | <b>0,746 ± 0,139</b> |
|        | 1   | 4°C            | 0,412 ± 0            | 0,412 ± 0      | 100,00       | -              | -              | -              | -              | -                    |
|        | 3   | 4°C            | 0,406 ± 0            | 0,406 ± 0      | 100,00       | -              | -              | -              | -              | -                    |
|        | 10  | 4°C            | 0,445 ± 0            | 0,416 ± 0      | 98,05        | 1,889 ± 0,003  | -              | 1,947 ± 0,014  | -              | -                    |
|        | 14  | 4°C            | 0,441 ± 0,001        | 0,412 ± 0      | 98,20        | 2,012 ± 0,007  | -              | 1,799 ± 0,023  | -              | -                    |
| PN22   | 3   | RT             | <b>0,523 ± 0,001</b> | 0,422 ± 0      | <b>94,32</b> | 1,945 ± 0,003  | 3,158 ± 0,002  | 5,682 ± 0,037  | 1,204 ± 0,048  | -                    |
|        | 10  | RT             | <b>0,688 ± 0,008</b> | 0,428 ± 0      | <b>88,92</b> | 2,018 ± 0,004  | 3,960 ± 0,067  | 11,082 ± 0,124 | 4,124 ± 0,133  | <b>0,736 ± 0,124</b> |
|        | 14  | RT             | <b>0,773 ± 0,016</b> | 0,436 ± 0,001  | <b>84,00</b> | 2,017 ± 0,001  | 3,579 ± 0,1    | 16,004 ± 0,308 | 5,078 ± 0,333  | <b>0,13 ± 0,308</b>  |
|        | 1   | 4°C            | 0,437 ± 0            | 0,413 ± 0      | 98,47        | 1,939 ± 0,012  | -              | 1,527 ± 0,018  | -              | -                    |
|        | 3   | 4°C            | 0,495 ± 0,003        | 0,420 ± 0      | 95,57        | 1,961 ± 0,01   | 3,061 ± 0,062  | 4,427 ± 0,086  | 0,617 ± 0,136  | -                    |
|        | 10  | 4°C            | <b>0,646 ± 0,011</b> | 0,428 ± 0      | <b>89,92</b> | 2,011 ± 0,006  | 3,656 ± 0,068  | 10,076 ± 0,228 | 3,404 ± 0,234  | -                    |
|        | 14  | 4°C            | <b>0,635 ± 0,012</b> | 0,423 ± 0      | <b>90,73</b> | 2,055 ± 0,004  | 3,735 ± 0,076  | 9,272 ± 0,262  | 3,453 ± 0,252  | <b>0,117 ± 0,262</b> |

Results where the fraction of droplets >1µm is >5% and those exceeding USP specifications are indicated in bold; SD: standard deviation relative to the technical triplicate performed on each day of measurement; T<sup>a</sup>: storage temperature; A: ambient; N: refrigerator; TMGT: mean total droplet diameter; MDD1: mean droplet diameter of the first peak; MDD2: mean droplet diameter of the second peak; MDD3: mean droplet diameter of the third peak; PCT1: percentage distribution of peak 1 out of the total; PFAT1: percentage of droplets larger than 1µm; PFAT3: percentage of droplets larger than 3µm; PFAT5: percentage of droplets larger than 5µm.
